# Supplementary material for: A unique dysprosium selenoarsenate(iii) exhibiting a photocurrent response and slow magnetic relaxation behavior
Source: Royal Society of Chemistry journal article supplement (doi:10.1039/c6dt04266j), 2016-12-01
Supplement: c6dt04266j1.pdf [file c6dt04266j1.pdf]

## Supporting Information

### A unique dysprosium selenoarsenate(III) exhibiting photocurrent response and slow magnetic relaxation behavior

Jian Zhou,\* Hua-Hong Zou,\* Rongqing Zhao, Hong Xiao, and Qingran Ding

**General Remarks.** All analytical grade chemicals were obtained commercially and used without further purification. IR spectra were obtained from a powdered sample pelletized with KBr on an ABB Bomen MB 102 series IR spectrophotometer in the range of 400–4000 $\text{cm}^{-1}$ . Energy-dispersive X-ray analysis (EDXA) was taken by using a JEOL JSM-6700F field-emission scanning electron microscope. Room-temperature optical diffuse reflectance spectra of the powdered samples were obtained with a Shimadzu UV-3150 spectrometer. The absorption data were calculated from reflectance spectra by using the Kubelka–Munk function:  $a/S = (1-R^2)/2R$ , where  $a$  is the absorption coefficient,  $S$  is the scattering coefficient, and  $R$  is the reflectance. PXRD patterns were obtained using a Bruker D8 Advance XRD diffractometer with Cu  $K\alpha$  radiation ( $\lambda = 1.54056 \text{ \AA}$ ). The crystals of **1** were grinded and pressed uniformly on the FTO glass. The photocurrent experiment was performed on a CHI650E electrochemistry work station in a three-electrode system, the sample coated ITO glass as the working electrode, a Pt slice as auxiliary electrode and a saturated calomel electrode (SCE) as reference electrode. The supporting electrolyte solution was 0.1 mol·dm<sup>-3</sup> Na<sub>2</sub>SO<sub>4</sub> aqueous solution (100 mL). A 500 W Xe lamp with 420 nm was used as the illumination source. The lamp was kept on continuously, and a manual shutter was used to block exposure of the sample to the light. The sample was typically irradiated at intervals of 60 s.

#### Crystal Structure Determination

Single-crystal X-ray diffraction data for **1** were recorded on a Rigaku Mercury CCD diffractometer using a  $\omega$ -scan method with graphite monochromated Mo  $K\alpha$  radiation ( $\lambda = 0.71073 \text{ \AA}$ ) at 173(2) K to a maximum  $2\theta$  value (50.20 °). Absorption corrections were applied using multi-scan technique. The structure of **1** was solved by Direct Methods (SHELXS-97) and refined by full-matrix least-squares techniques using the SHELXL-97 program. Non-hydrogen atoms were refined with anisotropic displacement parameters. SIMU restraint prevents the thermal ellipsoids of all adjacent C and N atoms to adopt different orientations. The H atoms bonded to C/N/O atoms were positioned with idealized geometry and refined with fixed isotropic displacement parameters. The As1, As2, Se2 and Se4 atoms were disordered over site occupation factors of 0.85/0.15, 0.88/0.12, 0.85/0.15 and 0.88/0.12, respectively.

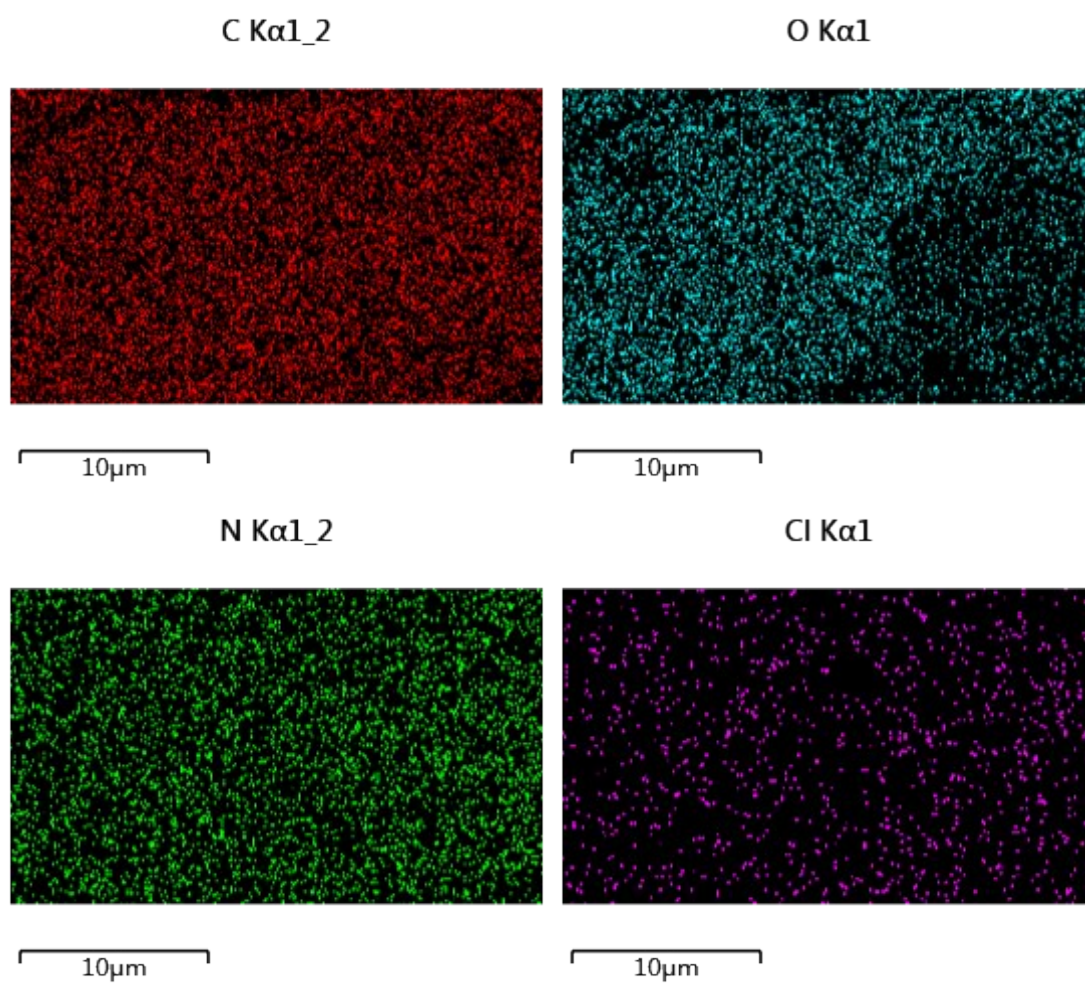

Fig. S1 EDS elemental mappings of C, O, N and Cl for **1**.

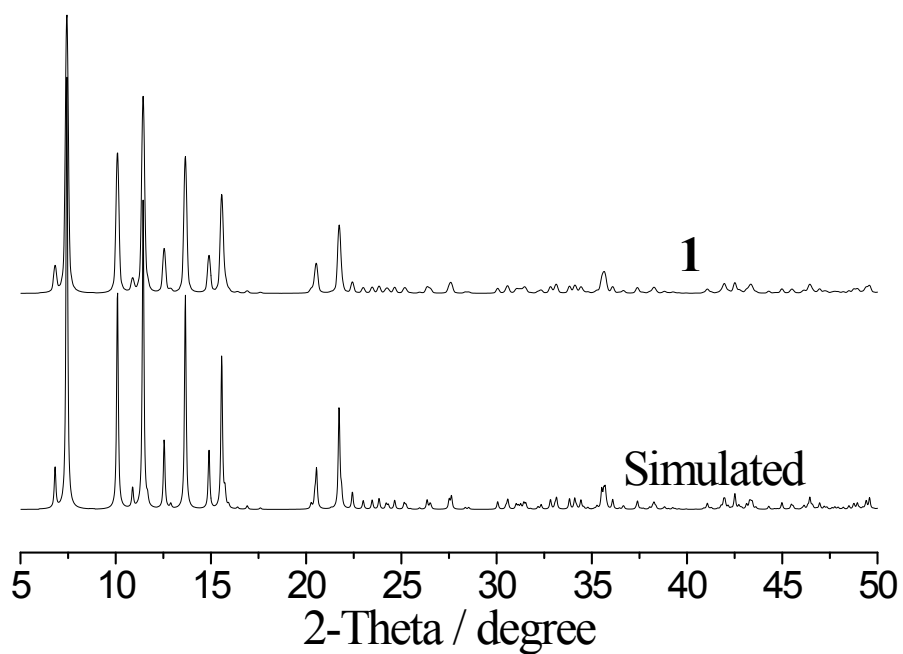

Fig. S2 Simulated and experimental powder XRD patterns of **1**.

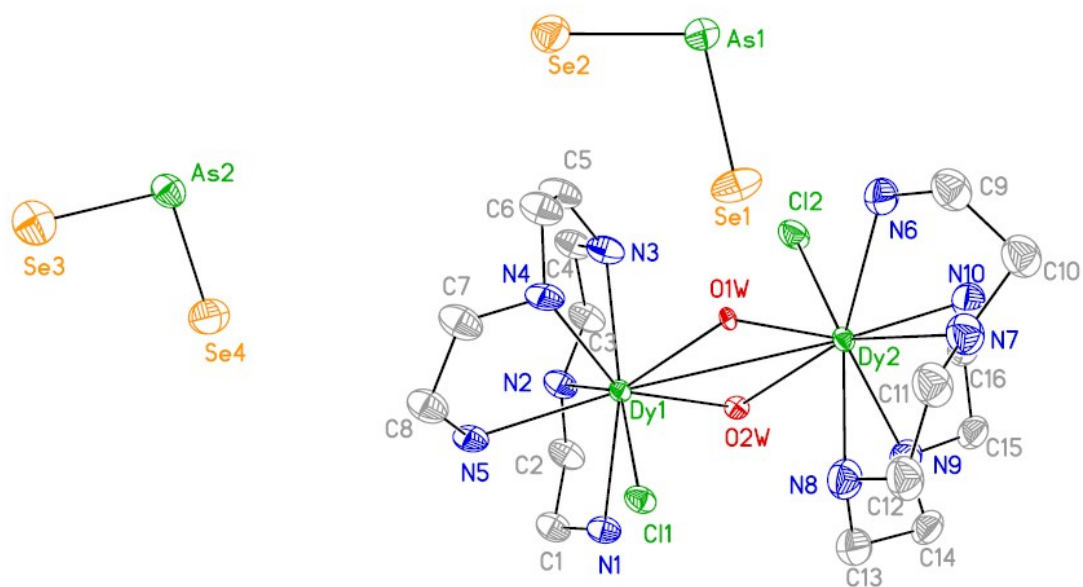

Fig. S3 The asymmetric unit of **1** (H atoms bonded to C and N atoms have been omitted for clarity)

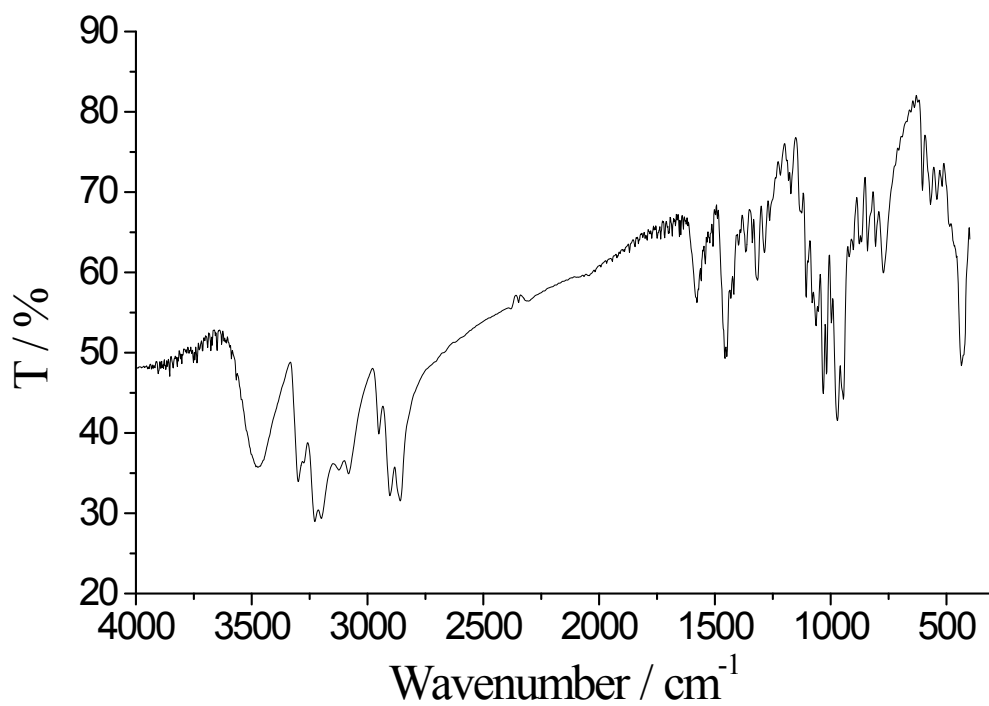

Fig. S4 IR spectrum of 1.

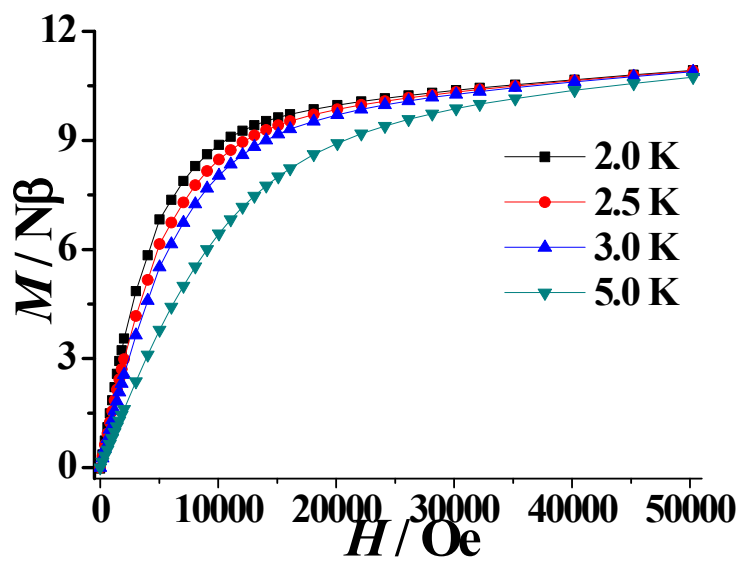

Fig. S5.  $M$  vs.  $H$  plot at various temperatures for 1.

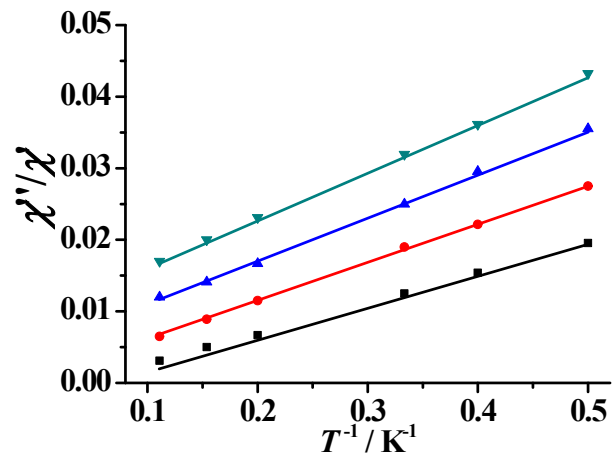

Fig. S6.  $\chi''/\chi'$  vs  $1/T$  plot for **1** at four different frequencies (10-1000 Hz range). The solid lines are the best-fit curves.

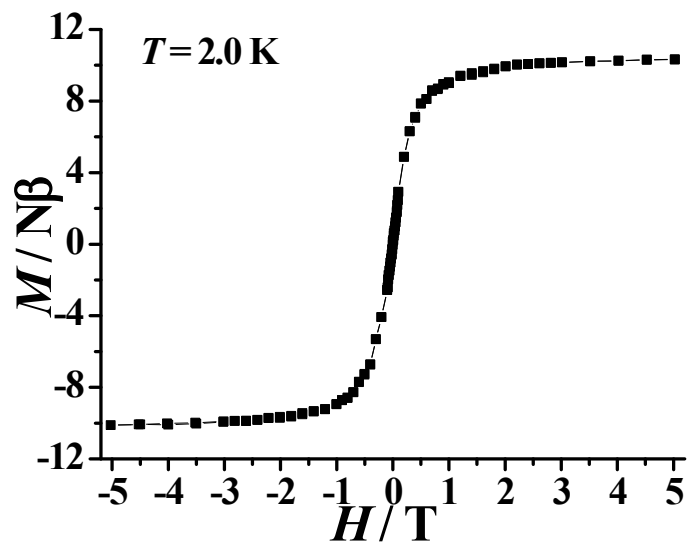

Fig. S7. Magnetic hysteresis loop of **1** recorded at 2 K.
